# Supplementary material for: Development and validation of a comprehensive radiomics nomogram for prognostic prediction of primary hepatic sarcomatoid carcinoma after surgical resection
Source: PubMed Central journal article supplement (PMC7976557; doi:10.7150/ijms.53602), 2021-02-06
Supplement: ijmsv18p1711s1.pdf [file ijmsv18p1711s1.pdf]

**Supplement figure 1.** An example of using radiomics nomogram to predict survival probability of a 35 years old male patient after surgical resection. ROI: region of interest; TACE: transcatheter arterial chemoembolization.

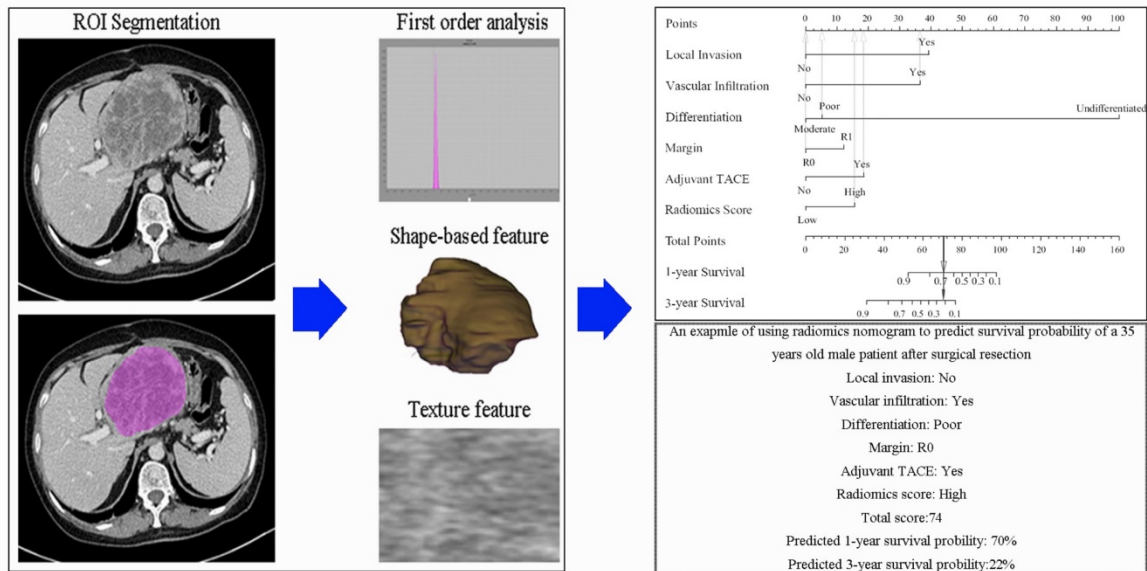

**Supplement figure 2.** The survival curves stratified by surgical margin, vascular invasion, local invasion, and differentiation grade. A: survival curves stratified by surgical margin; B: survival curves stratified by vascular invasion; C: survival curves stratified by local invasion; D: survival curves stratified by differentiation grade.

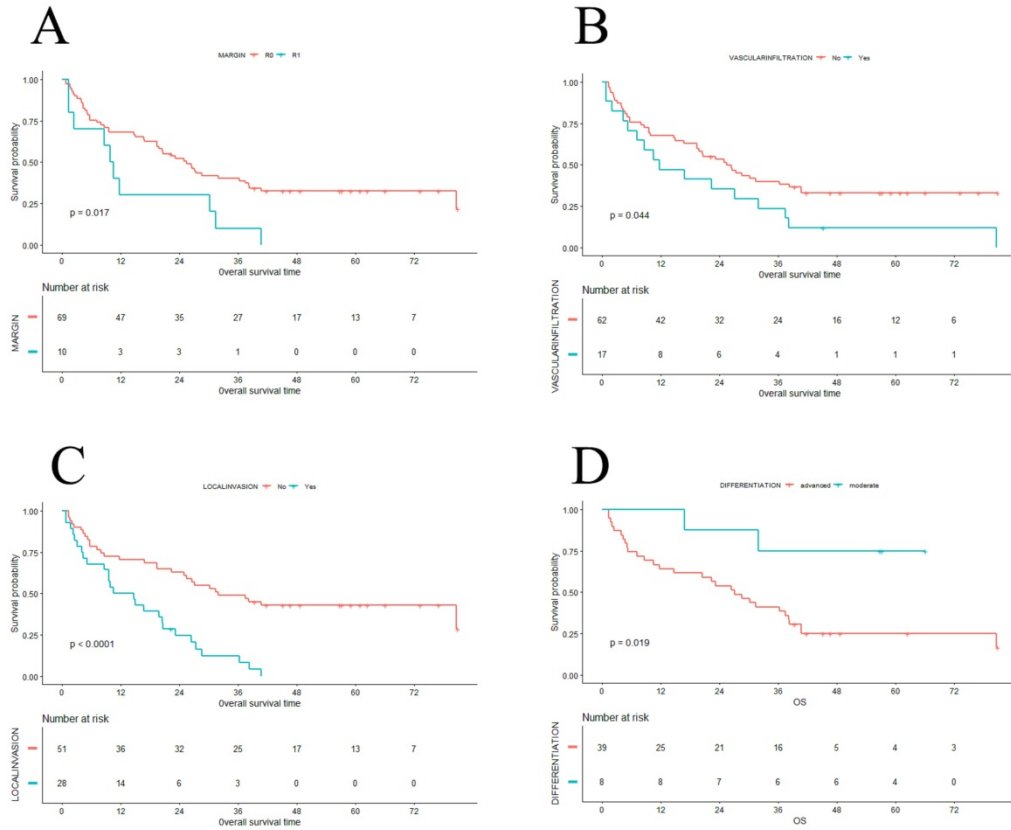

**Supplement table 1. The formulas for constructing the radiomics scoring models.**

| Model           | Formula                                                                                                    |
|-----------------|------------------------------------------------------------------------------------------------------------|
| radiomics score | $-0.0001249365\text{SHAPE\_Sphericity} + 3.2096802376\text{GLRLM\_LGRE} + 2.5467404092\text{GLRLM\_SRLGE}$ |

**Supplement table 2. Power analysis of the study.**

| High risk group/ Low risk group                         | value | High risk group/ Low risk group                         | value |
|---------------------------------------------------------|-------|---------------------------------------------------------|-------|
| Two-sided $\alpha$                                      | 0.05  | Two-sided $\alpha$                                      | 0.05  |
| 1-year overall survival rate ( <b>High risk group</b> ) | 0.306 | 3-year overall survival rate ( <b>High risk group</b> ) | 0.056 |
| 1-year overall survival rate ( <b>Low risk group</b> )  | 0.901 | 3-year overall survival rate ( <b>Low risk group</b> )  | 0.624 |
| Assuming hazard ratio                                   | 7.01  | Assuming hazard ratio                                   | 2.5   |
| Power                                                   | 90%   | Power                                                   | 90%   |
| Estimated patients number ( <b>High risk group</b> )    | 3     | Estimated patients number ( <b>High risk group</b> )    | 7     |
| Estimated patients number ( <b>Low risk group</b> )     | 4     | Estimated patients number ( <b>Low risk group</b> )     | 8     |
